# Supplementary material for: The ‘Cod-Multiple’: Modes of Existence of Fish, Science and People
Source: MDPI journal article supplement (doi:10.3390/su132112229), 2021-11-05
Supplement: s1 [file s1]

Archive with 1 entries (1 files):
- sustainability-1424953-supplementary.pdf
